# Supplementary material for: Development of a High-Throughput Method to Study the Inhibitory Effect of Phytochemicals on Trimethylamine Formation
Source: MDPI journal article supplement (doi:10.3390/nu13051466), 2021-04-26
Supplement: s1 [file s1]

## Supplementary Materials

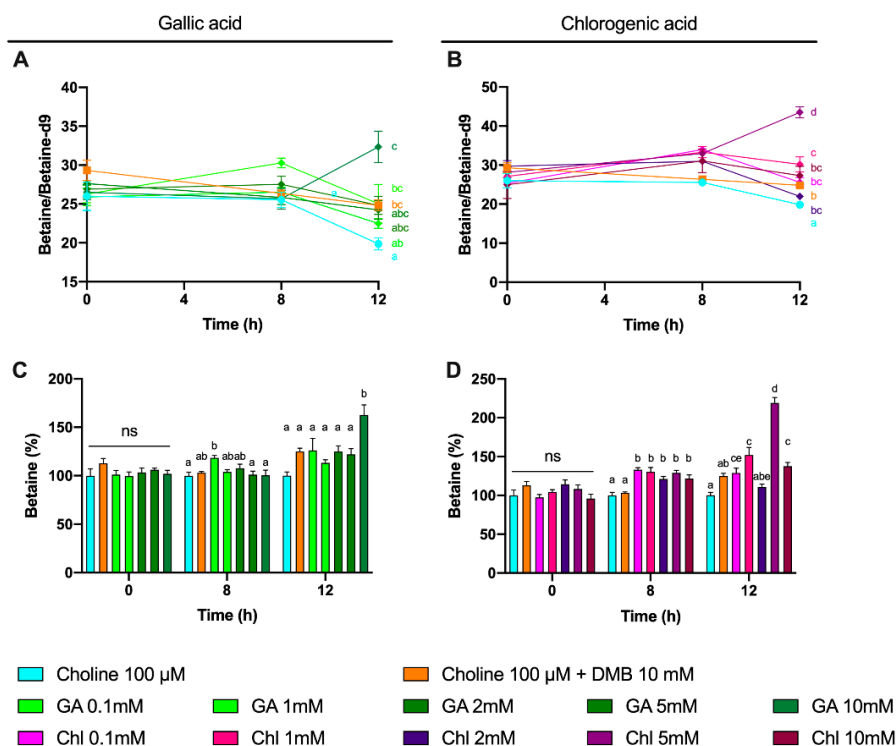

**Figure S1:** Effect of gallic acid and chlorogenic acid (A,B) in the peak area of betaine relativized to its internal standard betaine-d<sub>9</sub>. Relative changes in betaine/betaine-d<sub>9</sub> versus choline 100  $\mu$ M conditions (C,D). All fermentations were carried out at optimal conditions (fecal slurry 20 % and choline 100  $\mu$ M). Results are expressed as %  $\pm$  SEM ( $n=6$ ). Different letters indicate statistical differences ( $p<0.05$ ) by One-way (C,D) or Two-way (A,B) ANOVA (Tukey's post hoc test). Factors for Two-way ANOVA were gallic acid or chlorogenic acid concentration and time. Abbreviations: DMB, 3,3-dimethyl-1-butanol; GA, gallic acid; and Chl, chlorogenic acid.

**Table S1.** Molecular weight (MW), retention time (RT) and optimized MRM condition for TMA and related compounds.

| Compound                        | MW     | RT (min) | MS/MS Transition | CV (V) | CE (eV) |
|---------------------------------|--------|----------|------------------|--------|---------|
| Choline                         | 103.16 | 1.01     | 104.2>60.0       | 38     | 16      |
| Choline-d <sub>9</sub>          | 112.16 | 1.02     | 113.3>69.1       | 40     | 16      |
| L-carnitine                     | 161.20 | 2.17     | 162.3>85.0       | 34     | 20      |
| L-carnitine-d <sub>9</sub>      | 170.25 | 2.17     | 171.3>85.0       | 34     | 20      |
| Betaine                         | 117.15 | 1.07     | 118.2>59.4       | 44     | 18      |
| Betaine-d <sub>9</sub>          | 126.15 | 1.07     | 127.3>68.1       | 46     | 18      |
| $\gamma$ -Butyrobetaine         | 145.20 | 2.26     | 146.3>87.0       | 26     | 16      |
| TMAO                            | 75.11  | 1.35     | 76.2>58.9        | 40     | 10      |
| TMAO-d <sub>9</sub>             | 84.12  | 1.39     | 85.2>68.1        | 40     | 12      |
| TMA <sup>a</sup>                | 59.11  | 0.76     | 146.3>118.2      | 34     | 16      |
| TMA-d <sub>9</sub> <sup>a</sup> | 68.17  | 0.75     | 155.3>127.2      | 34     | 20      |

Abbreviations: TMAO, trimethylamine *N*-oxide; TMA, trimethylamine; MW, molecular weight; RT, retention time CV, cone voltage; and CE, collision energy. <sup>a</sup> Molecular weight listed is for the original molecules, and MS/MS transitions listed for derivatives (ethyl betaine and ethyl betaine-d<sub>9</sub>).

**Table S2:** Parameters for the quantification of TMA and TMA-related compounds in spiked fecal fermentation samples by UPLC-MS/MS.

| Compound        | Calibration curve      | R <sup>2</sup> | Working linearity range (μM) | LOD (μM) | LOQ (μM) | MDL (μM) <sup>a</sup> | MQL (μM) <sup>a</sup> |
|-----------------|------------------------|----------------|------------------------------|----------|----------|-----------------------|-----------------------|
| Choline         | $y = 0.765x + 3.003$   | 0.997          | 1.93 – 247.10                | 0.488    | 1.628    | 0.977                 | 3.256                 |
| L-carnitine     | $y = 5.932x - 4.723$   | 0.997          | 0.24 – 497.72                | 0.024    | 0.081    | 0.049                 | 0.162                 |
| γ-Butyrobetaine | $y = 0.197x + 0.181$   | 0.998          | 0.27 – 37.92                 | 0.032    | 0.105    | 0.063                 | 0.210                 |
| TMAO            | $y = 0.355x - 0.978$   | 0.997          | 0.43 – 228.71                | 0.011    | 0.037    | 0.075                 | 0.075                 |
| TMA             | $y = 58.301x + 13.776$ | 0.999          | 0.84 – 462.73                | 0.194    | 0.648    | 0.387                 | 1.291                 |

Abbreviations: TMAO, trimethylamine N-oxide; TMA, trimethylamine; R<sup>2</sup>, determination coefficient; LOD, limit of detection; LOQ, limit of quantification; MDL, method detection limit; and MQL, method quantification limit. <sup>a</sup> MDL and MQL for 25 μL of fecal fermentation media.
